# Supplementary material for: Corneal confocal microscopy for identification of diabetic sensorimotor polyneuropathy: a pooled multinational consortium study
Source: Springer Nature journal article supplement (doi:10.1007/s00125-018-4653-8), 2018-06-04
Supplement: MOESM1 [file 15816386]

## **ELECTRONIC SUPPLEMENTARY MATERIAL (ESM)**

### **1. ESM METHODS**

#### **Study Population**

The study population was accrued from the baseline evaluations of a consortium of 5 different cohort studies initiated between 2008 and 2011.[1-5] The objectives of the 5 studies were to determine the role of in vivo corneal confocal microscopy (IVCCM) as a biomarker for diabetic neuropathy. The five study centres included: Queensland University of Technology (Brisbane, QLD, Australia), the University of Calgary (Calgary, AB, Canada), the University of Manchester (Manchester, UK), the University of Michigan (Ann Arbor, MI, USA), and the University of Toronto (Toronto, ON, Canada). Preliminary analyses of diagnostic validity have been published by the Toronto[4] and Manchester,[3] cohorts and the Brisbane site has published other outcomes using baseline data[5]. This current study includes patient-level data from all baseline visits from all five sites, some of which was accrued after the publication of these preliminary works. In September 2014, the NIH funded continued longitudinal follow-up of participants from the studies initiated at each of these sites; this manuscript is the first to be published by this collaboration.

The presence of diabetes mellitus was defined in accordance with American Diabetes Association guidelines. Neuropathy due to non-diabetic causes, current eye infection or other conditions that precluded IVCCM, or allergy to the ocular anesthetic used during the IVCCM exam were exclusions. Neuropathies due to non-diabetic causes were determined through detailed patient history or through screening of immunoglobulins and B12 levels, depending on each site's local protocol. The protocol and consent procedures at all sites were approved by local research ethics boards, and written informed consent was provided by all study participants or their legal guardians.

### **Index Test (IVCCM Examination)**

Participants underwent examination of the sub-basal nerve plexus of the cornea using the Heidelberg Tomograph Rostock Cornea Module III (Heidelberg Engineering GmbH, Heidelberg, Germany and Heidelberg Engineering, Smithfield, RI, USA) according to published methods.[6] In brief, topical anaesthetic and a viscous gel medium were applied, permitting a visual gel bridge between the cornea and the sterile single-use cap on the microscope's objective lens. Images were taken through the sub-basal layer over a depth of 50 microns using methods that had minor procedural variation between centres.[7] The most technically sound images were identified manually by site staff, and IVCCM parameters were measured using a manual protocol and an automated protocol[8,9] that served as a method of standardization. The latter was also performed as it represents a significant resource-sparing tool that has not been systematically studied for validity compared to the standard manual method. For the manual protocol of image analysis, the examiner traced nerve fibres on the images using a graphic tablet and pen and the parameters were determined using semi-automated analytical software (CCM Image Analysis tool v0.6, developed by M. Dabbah, University of Manchester). For the automated protocol, fully-automated software determined the parameters (ACCMetrics Image Analysis Software v2.0, developed by M. Dabbah and X. Chen, University of Manchester). Results from 1-8 images per eye were averaged. Measured parameters were corneal nerve fibre length (CNFL), expressed as the total length of nerves in mm/mm<sup>2</sup> of image area; corneal nerve branch density (CNBD), expressed as the number of branches/mm<sup>2</sup>; and corneal nerve fibre density (CNFD), expressed as the number of fibres/mm<sup>2</sup>. The automated protocol is known to provide measures of CNFL that are systematically 30% lower than manually-derived CNFL.[8,9] Subscripts AUTO and MANUAL indicate automated and manual quantification. Raters were either trained in

## Section 1. ESM Methods

optometry or ophthalmology, except Toronto, which used research assistants who underwent two-day training by the microscope manufacturer. Published data have demonstrated similar cohort IVCCM characteristics, reproducibility, and concurrent validity regardless of study centre.[1,2,4,7,10-12]

### **Reference Standard (Clinical Evaluation and Nerve Conduction Studies)**

All study participants underwent nerve conduction studies and comprehensive physical examination. For nerve conduction studies, all investigational sites measured the dominant limb peroneal and sural nerves using clinical nerve conduction study equipment according to the standards of the American Association for Neuromuscular and Electrodiagnostic Medicine. Each centre performed examinations and collected data independently and results were sent to the centre leading statistical analysis (Toronto) where an algorithm was used to determine neuropathy cases. Locally, the results of the neurological examinations were organized into clinical symptom and clinical sign scores, with different centres using different scores according to their baseline study protocols (which were determined prior to the formation of the current consortium). The scores for symptoms included neuropathy symptom score (NSS), neuropathy symptom profile (NSP), and diabetic neuropathy symptom (DNS) score and the scores for signs included the neuropathy disability score (NDS) and Toronto clinical neuropathy score (TCNS). The algorithm for the reference standard was positive if two criteria were met: 1) if a clinical symptom or clinical signs were present and 2) if peroneal motor nerve conduction velocity was less than 42 m/s. This reference standard was based on consensus criteria.[13-15]

Reference standard definitions using other combinations of abnormal peroneal and/or sural nerve parameters and/or presence of signs and symptoms were considered in sensitivity analysis. Other nerve conduction parameters included sural nerve amplitude potential and conduction

## Section 1. ESM Methods

velocity, and peroneal nerve amplitude potential, conduction velocity, and F-wave latency (adjusted for height). Amplitude potentials were adjusted for age. Specifically, these alternate reference standards included the following 6 case-definitions: i) abnormal sural nerve amplitude potential ( $\leq 7.2 \mu\text{V}$  if age  $\leq 65$  and  $\leq 5.5 \mu\text{V}$  if age  $> 65$ ); ii) using each centre's local case-definition where nerve conduction values were considered abnormal when greater than the 99th percentile or less than the 1st percentile in the reference healthy population database used at each site, according to the ranges determined during certification of the clinical laboratories; iii) any abnormal sural nerve parameter, corroborated by any abnormal peroneal parameter, corroborated by the presence of at least one sign or one symptom ("Toronto site's definition"); iv) the study's reference standard described above; v) the presence of a high number of signs and/or symptoms ("Clinical Definition"); and vi) the presence of a high number of signs and/or symptoms, corroborated by peroneal motor nerve conduction velocity  $< 42 \text{ m/s}$  ("Stringent Clinical Definition").

### **Variables Used for Sensitivity Analyses**

Sensitivity analyses were undertaken to account for an imperfect reference standard.[14] Specifically, electrophysiology and clinically relevant signs and symptoms detect large nerve fibre dysfunction and may fail to identify patients with early small fibre neuropathy detected using IVCCM.[16] Skin Biopsy for IENFD assessment was undertaken in a subset of the Manchester participants,[17] and was used in resolver test analysis (Sensitivity Analysis #2). Other evaluations included blood pressure, smoking history and biochemical tests including glycated hemoglobin  $A_{1c}$ , serum lipids, and urinary albumin excretion (generally conducted on the same day as or within 1 week of the neuropathy evaluation). Cooling detection thresholds were determined in the majority of participants by CASE IV (WR Medical Electronics Co., MN,

USA) or the Medoc TSA-II NeuroSensory Analyzer (Medoc Advanced Medical Systems, Ramat-Yishai, Israel), using the method of limits.

## **Statistics**

The available sample size yielded a power of >0.99 to detect a conservative area under the receiver operating characteristic curve (AUC) of 0.70 from the null hypothesis of 0.50. AUC was compared within study populations using the method of Pencina et al.[18] AUC was compared between study populations using the method of Hanley & McNeil.[19] Optimal diagnostic thresholds were identified by distance to the point of perfect discrimination using the formula  $\sqrt{(0-x)^2 + (1-y)^2}$ . The sensitivity analyses to account for imperfect reference standard included: 1) modification of the reference standard definition parameters to create less- and more-stringent definitions (as described above); 2) use of composite reference standard methods incorporating small fibre measures of intra-epidermal nerve fibre density into the definition of neuropathy cases;[17] and 3) latent class analysis that identified clusters of patients who shared common clinical characteristics and neurological test results (including the clinical scales, cooling detection threshold tests,[20] and electrophysiological tests) that were consistent with the presence of neuropathy.[21] Details of variables used in these analyses are provided above. ROC regression was performed according to the method of Janes, Longton, and Pepe.[22] Additionally, while we focused on the optimal diagnostic threshold as the single value that simultaneously maximized sensitivity and specificity, we conducted an alternate approach in which a pair of diagnostic thresholds were determined - one lower value chosen to maximize specificity (more confidently rule in the presence of neuropathy) and one higher value chosen to simultaneously maximize sensitivity (more confidently rule out the presence of neuropathy). To accomplish this, we used a combination of decision criteria that included threshold values that i)

## Section 1. ESM Methods

maximized positive and negative likelihood ratios, and ii) minimized false positives and false negatives.

## 2. ESM Tables

**ESM Table 1.** Characteristics of the 998 study participants, according to study centre.

| Characteristic               | Total<br>N=998 | Brisbane<br>n=235 | Calgary<br>n=84 | Manchester<br>n=281 | Michigan<br>n=17 | Toronto<br>n=381 | <i>p</i> -value |
|------------------------------|----------------|-------------------|-----------------|---------------------|------------------|------------------|-----------------|
| Female Sex                   | 420 (42%)      | 110 (47%)         | 40 (48%)        | 110 (39%)           | 5 (29%)          | 155 (41%)        | 0.23            |
| Age (y)                      | 52±18          | 52 ± 14           | 15 ± 2          | 58 ± 14             | 51 ± 13          | 55 ± 17          | <0.001          |
| Ethnicity                    |                |                   |                 |                     |                  |                  |                 |
| Aboriginal North American    | 1 (0%)         | 0 (0%)            | 1 (1%)          | 0 (0%)              | 0 (0%)           | 0 (0%)           |                 |
| Asian                        | 132 (13%)      | 11 (5%)           | 5 (6%)          | 81 (29%)            | 0 (0%)           | 35 (9%)          |                 |
| Black                        | 11 (1%)        | 0 (0%)            | 1 (1%)          | 3 (1%)              | 1 (6%)           | 6 (2%)           |                 |
| Hawaiian or Pacific Islander | 1 (0%)         | 1 (0%)            | 0 (0%)          | 0 (0%)              | 0 (0%)           | 0 (0%)           |                 |
| Hispanic                     | 15 (2%)        | 0 (0%)            | 1 (1%)          | 0 (0%)              | 0 (0%)           | 14 (4%)          |                 |
| Middle Eastern               | 5 (1%)         | 3 (1%)            | 0 (0%)          | 2 (1%)              | 0 (0%)           | 0 (0%)           |                 |
| White                        | 799 (80%)      | 209 (89%)         | 75 (89%)        | 195 (69%)           | 13 (76%)         | 307 (81%)        |                 |
| Other/Unknown/Unreported     | 34 (3%)        | 11 (5%)           | 1 (1%)          | 0 (0%)              | 3 (18%)          | 19 (5%)          |                 |
| Diabetes duration (y)        | 17±13          | 18 ± 14           | 9 ± 3           | 21 ± 14             | 9 ± 4            | 16 ± 13          | <0.001          |
| BMI (kg/m <sup>2</sup> )     | 28.1±6.1       | 28.8 ± 6.2        | 21.6 ± 3.2      | 29.0 ± 5.9          | 33.8 ± 5.8       | 28.3 ± 5.5       | <0.001          |
| A <sub>1c</sub> (mmol/mol)   | 63±18          | 63 ± 16           | 74 ± 19         | 64 ± 17             | 66 ± 13          | 60 ± 18          | <0.001          |
| A <sub>1c</sub> (%)          | 7.9±1.6        | 7.9 ± 1.5         | 8.9 ± 1.8       | 8.0 ± 1.6           | 8.2 ± 1.2        | 7.6 ± 1.6        | <0.001          |
| Neurological exam            |                |                   |                 |                     |                  |                  |                 |
| Sign Score Used              | -              | NDS               | NDS             | NDS                 | -                | TCNS             | -               |
| Median Sign Score            | -              | 1[0,3]            | 0[0,0]          | 3[1,6]              | -                | 6[3,9]           | -               |
| Sign(s) Present              | 721 (72%)      | 138 (59%)         | 14 (17%)        | 217 (78%)           | 15 (88%)         | 337 (90%)        | <0.001          |
| Symptom Score Used           | -              | DNS               | NSS             | NSP                 | -                | TCNS             | -               |
| Median Symptom Score         | -              | 0[0,1]            | 0[0,0]          | 3[1,7]              | -                | 2[0,4]           | -               |
| Symptom(s) Present           | 606 (61%)      | 90 (38%)          | 2 (2%)          | 222 (80%)           | 14 (82%)         | 278 (73%)        | <0.001          |
| Nerve conduction studies     |                |                   |                 |                     |                  |                  |                 |
| Sural AMP (µV)               | 8.3 ± 7.9      | 8.2 ± 9.4         | 17.9 ± 7.1      | 9.1 ± 7.2           | 5.2 ± 5.9        | 5.8 ± 5.6        | <0.001          |
| Sural CV (m/s)               | 41.2 ± 7.1     | 37.4 ± 6.7        | 45.9 ± 4.9      | 43.1 ± 7.6          | 39.8 ± 5.4       | 41.3 ± 6.4       | <0.001          |
| Peroneal AMP (mV)            | 3.7 ± 2.6      | 4.2 ± 2.7         | 5.3 ± 1.8       | 3.2 ± 2.6           | -                | 3.5 ± 2.6        | <0.001          |
| Peroneal CV (m/s)            | 41.4 ± 7.5     | 43.6 ± 7.3        | 46.9 ± 4.5      | 41.4 ± 8.0          | 37.7 ± 7.6       | 39.0 ± 6.7       | <0.001          |
| Peroneal F-wave (ms)         | 57.9 ± 10.3    | 56.0 ± 7.7        | -               | 55.4 ± 8.9          | -                | 60.9 ± 11.8      | <0.001          |
| DSP present                  | 415 (42%)      | 57 (24%)          | 0 (0%)          | 120 (43%)           | 12 (71%)         | 226 (59%)        | <0.001          |

*IVCCM Parameters*

Automated protocol

Section 2. ESM Figures and Tables

| Characteristic                                     | Total<br>N=998 | Brisbane<br>n=235 | Calgary<br>n=84 | Manchester<br>n=281 | Michigan<br>n=17 | Toronto<br>n=381 | <i>p</i> -value |
|----------------------------------------------------|----------------|-------------------|-----------------|---------------------|------------------|------------------|-----------------|
| CNFL <sub>AUTO</sub> (mm/mm <sup>2</sup> )         | 12.5 ± 4.6     | 15.6 ± 3.9        | 15.2 ± 2.9      | 12.2 ± 4.6          | 15.3 ± 6.4       | 10.2 ± 3.6       | <0.001          |
| CNBD <sub>AUTO</sub> (branches/mm <sup>2</sup> )   | 22.7 ± 18.3    | 24.8 ± 19.7       | 30.6 ± 13.6     | 25.3 ± 19.4         | -                | 17.9 ± 16.2      | <0.001          |
| CNFD <sub>AUTO</sub> (fibres/mm <sup>2</sup> )     | 20.6 ± 9.8     | 17.3 ± 7.4        | 24.5 ± 5.8      | 19.0 ± 8.9          | -                | 22.9 ± 11.4      | <0.001          |
| Manual protocol                                    |                |                   |                 |                     |                  |                  |                 |
| CNFL <sub>MANUAL</sub> (mm/mm <sup>2</sup> )       | 17.3 ± 6.5     | 17.8 ± 6.5        | 22.8 ± 4.7      | 19.2 ± 7.3          | -                | 14.5 ± 4.7       | <0.001          |
| CNBD <sub>MANUAL</sub> (branches/mm <sup>2</sup> ) | 50.9 ± 40.0    | 68.6 ± 52.5       | 70.1 ± 30.1     | 55.9 ± 37.9         | -                | 32.4 ± 23.5      | <0.001          |
| CNFD <sub>MANUAL</sub> (fibres/mm <sup>2</sup> )   | 38.6 ± 26.3    | 98.6 ± 44.8       | 31.3 ± 7.4      | 24.3 ± 8.7          | -                | 38.3 ± 11.7      | <0.001          |
| T1DM/T2DM                                          | 516 / 482      | 156 / 79          | 84 / 0          | 135 / 146           | 2 / 15           | 139 / 242        | <0.001          |

NDS, neuropathy disability score; TCNS, Toronto clinical neuropathy score; DNS, diabetic neuropathy symptom; DSP, diabetic sensorimotor polyneuropathy; NSS, neuropathy symptom score; NSP, neuropathy symptom profile; IVCCM, in vivo corneal confocal microscopy; CNFL, corneal nerve fibre length; CNBD, corneal nerve branch density; CNFD, corneal nerve fibre density. T1DM, type 1 diabetes mellitus; T2D, type 2 diabetes mellitus. P-value from test for trend.



**ESM Table 2.** Selected neurological characteristics and mean IVCCM parameters in the derivation sets, according to the absence or presence of DSP.

| Parameter                                          | Neuropathy<br>Controls | Neuropathy<br>Cases | <i>p</i> -value |
|----------------------------------------------------|------------------------|---------------------|-----------------|
| <b>Type 1 diabetes</b>                             | 182 (70%)              | 78 (30%)            |                 |
| Neurological exam                                  |                        |                     |                 |
| Sign(s) present                                    | 76 (42%)               | 72 (94%)            | <0.001          |
| Symptom(s) present                                 | 37 (20%)               | 68 (87%)            | <0.001          |
| Nerve conduction studies                           |                        |                     |                 |
| Sural AMP ( $\mu$ V)                               | 13.0 $\pm$ 8.2         | 3.3 $\pm$ 4.4       | <0.001          |
| Peroneal CV (m/s)                                  | 45.3 $\pm$ 4.7         | 34.3 $\pm$ 7.1      | <0.001          |
| IVCCM parameters                                   |                        |                     |                 |
| CNFL <sub>AUTO</sub> (mm/mm <sup>2</sup> )         | 14.1 $\pm$ 3.9         | 9.6 $\pm$ 4.5       | <0.001          |
| CNBD <sub>AUTO</sub> (branches/mm <sup>2</sup> )   | 25.4 $\pm$ 16.1        | 13.9 $\pm$ 14.0     | <0.001          |
| CNFD <sub>AUTO</sub> (fibres/mm <sup>2</sup> )     | 21.9 $\pm$ 8.4         | 15.2 $\pm$ 9.6      | <0.001          |
| CNFL <sub>MANUAL</sub> (mm/mm <sup>2</sup> )       | 19.4 $\pm$ 5.7         | 13.7 $\pm$ 6.1      | <0.001          |
| CNBD <sub>MANUAL</sub> (branches/mm <sup>2</sup> ) | 58.4 $\pm$ 34.4        | 35.3 $\pm$ 30.4     | <0.001          |
| CNFD <sub>MANUAL</sub> (fibres/mm <sup>2</sup> )   | 34.1 $\pm$ 10.3        | 25.3 $\pm$ 12.3     | <0.001          |
| <b>Type 2 diabetes</b>                             | 115 (49%)              | 121 (51%)           |                 |
| Neurological exam                                  |                        |                     |                 |
| Sign(s) present                                    | 86 (77%)               | 110 (98%)           | <0.001          |
| Symptom(s) present                                 | 71 (63%)               | 112 (97%)           | <0.001          |
| Nerve conduction studies                           |                        |                     |                 |
| Sural AMP ( $\mu$ V)                               | 9.6 $\pm$ 7.4          | 3.1 $\pm$ 4.2       | <0.001          |
| Peroneal CV (m/s)                                  | 46.3 $\pm$ 5.1         | 35.5 $\pm$ 5.6      | <0.001          |
| IVCCM parameters                                   |                        |                     |                 |
| CNFL <sub>AUTO</sub> (mm/mm <sup>2</sup> )         | 13.6 $\pm$ 4.3         | 11.0 $\pm$ 4.0      | <0.001          |
| CNBD <sub>AUTO</sub> (branches/mm <sup>2</sup> )   | 29.5 $\pm$ 20.0        | 19.7 $\pm$ 18.0     | <0.001          |
| CNFD <sub>AUTO</sub> (fibres/mm <sup>2</sup> )     | 21.9 $\pm$ 9.4         | 21.3 $\pm$ 11.4     | 0.63            |
| CNFL <sub>MANUAL</sub> (mm/mm <sup>2</sup> )       | 19.4 $\pm$ 6.9         | 15.0 $\pm$ 5.8      | <0.001          |
| CNBD <sub>MANUAL</sub> (branches/mm <sup>2</sup> ) | 67.7 $\pm$ 49.5        | 39.5 $\pm$ 34.8     | <0.001          |
| CNFD <sub>MANUAL</sub> (fibres/mm <sup>2</sup> )   | 51.3 $\pm$ 40.4        | 37.3 $\pm$ 20.7     | 0.28            |
| <b>Total Derivation Set</b>                        | 297 (60%)              | 199 (40%)           |                 |
| Neurological exam                                  |                        |                     |                 |
| Sign(s) present                                    | 162 (55%)              | 182 (96%)           | <0.001          |
| Symptom(s) present                                 | 108 (37%)              | 180 (93%)           | <0.001          |
| Nerve conduction studies                           |                        |                     |                 |
| Sural AMP ( $\mu$ V)                               | 11.7 $\pm$ 8.1         | 3.2 $\pm$ 4.2       | <0.001          |
| Peroneal CV (m/s)                                  | 45.7 $\pm$ 4.9         | 35.0 $\pm$ 6.2      | <0.001          |
| IVCCM parameters                                   |                        |                     |                 |
| CNFL <sub>AUTO</sub> (mm/mm <sup>2</sup> )         | 13.9 $\pm$ 4.1         | 10.5 $\pm$ 4.2      | <0.001          |
| CNBD <sub>AUTO</sub> (branches/mm <sup>2</sup> )   | 27.0 $\pm$ 17.8        | 17.4 $\pm$ 17.4     | <0.001          |
| CNFD <sub>AUTO</sub> (fibres/mm <sup>2</sup> )     | 21.9 $\pm$ 8.8         | 18.8 $\pm$ 11.1     | 0.001           |
| CNFL <sub>MANUAL</sub> (mm/mm <sup>2</sup> )       | 19.4 $\pm$ 6.2         | 14.5 $\pm$ 6.0      | <0.001          |
| CNBD <sub>MANUAL</sub> (branches/mm <sup>2</sup> ) | 62.0 $\pm$ 41.1        | 37.9 $\pm$ 33.1     | <0.001          |
| CNFD <sub>MANUAL</sub> (fibres/mm <sup>2</sup> )   | 42.6 $\pm$ 30.4        | 33.1 $\pm$ 19.1     | 0.012           |

AMP, amplitude potential; DSP, diabetic sensorimotor polyneuropathy; CV, conduction velocity; IVCCM, in vivo corneal confocal microscopy; CNFL, corneal nerve fibre length; CNBD, corneal nerve branch density; CNFD, corneal nerve fibre density.

**ESM Table 3.** Characteristics and comparisons of ROC curves for DSP in the derivation and validation sets, and in the total study population.

| Parameter                             | AUC  | 95% CI for AUC | <i>p</i> -value | Optimal Thresholds             |      |      |
|---------------------------------------|------|----------------|-----------------|--------------------------------|------|------|
|                                       |      |                |                 | Value                          | Sn   | Sp   |
| <b>Derivation Sets</b>                |      |                |                 |                                |      |      |
| <i>Type 1 diabetes</i>                |      |                |                 |                                |      |      |
| CNFL <sub>AUTO</sub>                  | 0.77 | 0.71, 0.84     | -               | <12.5 mm/mm <sup>2</sup>       | 0.73 | 0.69 |
| CNBD <sub>AUTO</sub>                  | 0.73 | 0.66, 0.80     | <0.001          | <12.5 branches/mm <sup>2</sup> | 0.62 | 0.78 |
| CNFD <sub>AUTO</sub>                  | 0.71 | 0.63, 0.78     | <0.001          | <16.5 fibres/mm <sup>2</sup>   | 0.56 | 0.71 |
| CNFL <sub>MANUAL</sub>                | 0.75 | 0.69, 0.82     | 0.090           | <16.4 mm/mm <sup>2</sup>       | 0.71 | 0.67 |
| CNBD <sub>MANUAL</sub>                | 0.72 | 0.65, 0.79     | <0.001          | <37.6 branches/mm <sup>2</sup> | 0.67 | 0.72 |
| CNFD <sub>MANUAL</sub>                | 0.70 | 0.62, 0.79     | 0.001           | <28.0 fibres/mm <sup>2</sup>   | 0.65 | 0.75 |
| <i>Type 2 diabetes</i>                |      |                |                 |                                |      |      |
| CNFL <sub>AUTO</sub>                  | 0.68 | 0.62, 0.75     | -               | <12.3 mm/mm <sup>2</sup>       | 0.69 | 0.63 |
| CNBD <sub>AUTO</sub>                  | 0.66 | 0.59, 0.73     | 0.011           | <18.8 branches/mm <sup>2</sup> | 0.62 | 0.67 |
| CNFD <sub>AUTO</sub>                  | 0.52 | 0.44, 0.59     | <0.001          | <22.8 fibres/mm <sup>2</sup>   | 0.59 | 0.48 |
| CNFL <sub>MANUAL</sub>                | 0.69 | 0.63, 0.76     | 0.13            | <16.3 mm/mm <sup>2</sup>       | 0.65 | 0.69 |
| CNBD <sub>MANUAL</sub>                | 0.69 | 0.62, 0.76     | 0.18            | <44.8 branches/mm <sup>2</sup> | 0.69 | 0.63 |
| CNFD <sub>MANUAL</sub>                | 0.54 | 0.47, 0.62     | 0.012           | <39.2 fibres/mm <sup>2</sup>   | 0.69 | 0.41 |
| <b>Validation Sets</b>                |      |                |                 |                                |      |      |
| <i>Type 1 diabetes</i>                |      |                |                 |                                |      |      |
| CNFL <sub>AUTO</sub>                  | 0.74 | 0.68, 0.81     | -               | <11.7 mm/mm <sup>2</sup>       | 0.67 | 0.74 |
| CNBD <sub>AUTO</sub>                  | 0.65 | 0.58, 0.72     | <0.001          | <18.8 branches/mm <sup>2</sup> | 0.67 | 0.57 |
| CNFD <sub>AUTO</sub>                  | 0.69 | 0.61, 0.76     | <0.001          | <17.9 fibres/mm <sup>2</sup>   | 0.67 | 0.68 |
| CNFL <sub>MANUAL</sub>                | 0.69 | 0.62, 0.76     | <0.001          | <16.7 mm/mm <sup>2</sup>       | 0.73 | 0.64 |
| CNBD <sub>MANUAL</sub>                | 0.66 | 0.58, 0.73     | <0.001          | <40.2 branches/mm <sup>2</sup> | 0.70 | 0.57 |
| CNFD <sub>MANUAL</sub>                | 0.58 | 0.48, 0.67     | <0.001          | <28.0 fibres/mm <sup>2</sup>   | 0.48 | 0.70 |
| <i>Type 2 diabetes</i>                |      |                |                 |                                |      |      |
| CNFL <sub>AUTO</sub>                  | 0.63 | 0.56, 0.70     | -               | <12.2 mm/mm <sup>2</sup>       | 0.63 | 0.57 |
| CNBD <sub>AUTO</sub>                  | 0.61 | 0.53, 0.68     | 0.15            | <19.5 branches/mm <sup>2</sup> | 0.65 | 0.62 |
| CNFD <sub>AUTO</sub>                  | 0.54 | 0.47, 0.61     | <0.001          | <16.8 fibres/mm <sup>2</sup>   | 0.49 | 0.65 |
| CNFL <sub>MANUAL</sub>                | 0.65 | 0.58, 0.72     | 0.044           | <16.3 mm/mm <sup>2</sup>       | 0.66 | 0.63 |
| CNBD <sub>MANUAL</sub>                | 0.62 | 0.54, 0.69     | 0.32            | <44.5 branches/mm <sup>2</sup> | 0.67 | 0.55 |
| CNFD <sub>MANUAL</sub>                | 0.52 | 0.45, 0.60     | <0.001          | <35.9 fibres/mm <sup>2</sup>   | 0.58 | 0.47 |
| <b>Total Study Population (N=998)</b> |      |                |                 |                                |      |      |
| CNFL <sub>AUTO</sub>                  | 0.71 | 0.68, 0.74     | -               | <12.3 mm/mm <sup>2</sup>       | 0.67 | 0.66 |
| CNBD <sub>AUTO</sub>                  | 0.65 | 0.61, 0.69     | <0.001          | <18.7 branches/mm <sup>2</sup> | 0.66 | 0.60 |
| CNFD <sub>AUTO</sub>                  | 0.60 | 0.56, 0.64     | <0.001          | <16.7 fibres/mm <sup>2</sup>   | 0.52 | 0.68 |
| CNFL <sub>MANUAL</sub>                | 0.70 | 0.66, 0.73     | 0.006           | <16.3 mm/mm <sup>2</sup>       | 0.67 | 0.66 |
| CNBD <sub>MANUAL</sub>                | 0.67 | 0.63, 0.70     | <0.001          | <38.9 branches/mm <sup>2</sup> | 0.64 | 0.63 |
| CNFD <sub>MANUAL</sub>                | 0.55 | 0.51, 0.59     | <0.001          | <27.8 fibres/mm <sup>2</sup>   | 0.41 | 0.70 |

P-value for comparison of AUC with that of CNFL<sub>AUTO</sub> (within the corresponding derivation set, validation set, or total study population).

Sn, sensitivity; Sp, specificity; CNFL, corneal nerve fibre length; CNBD, corneal nerve branch density; CNFD, corneal nerve fibre density.

Section 2. ESM Figures and Tables

**ESM Table 4.** Optimal threshold values and alternate pairs of thresholds for CNFL – with lower values meant to maximize specificity and higher values meant to maximize sensitivity – and their operating characteristics for identifying DSP in the total study population and the derivation and validation sets for type 1 and type 2 diabetes.

|                                                          | Optimal Single Threshold*<br>Value | Lower Threshold of the Threshold Pair |      |      |     | Higher Threshold of the Threshold Pair |      |      |      | Classification Scheme Using Threshold Pair |               |       |      |              |
|----------------------------------------------------------|------------------------------------|---------------------------------------|------|------|-----|----------------------------------------|------|------|------|--------------------------------------------|---------------|-------|------|--------------|
|                                                          |                                    | Value                                 | Sp   | PPV  | LR+ | Value                                  | Sn   | NPV  | LR-  | Correct                                    | Misclassified |       |      | Unclassified |
| <b>Total Study Population</b>                            |                                    |                                       |      |      |     |                                        |      |      |      |                                            |               |       |      |              |
| CNFL <sub>AUTO</sub>                                     | <12.3                              | <8.6                                  | 0.88 | 0.66 | 2.7 | <15.3                                  | 0.88 | 0.81 | 0.33 | 35.2%                                      | 12.2%         | 7.1%  | 5.1% | 52.6%        |
| CNFL <sub>MANUAL</sub>                                   | <16.3                              | <10.91                                | 0.88 | 0.64 | 2.6 | <21.8                                  | 0.89 | 0.81 | 0.33 | 31.0%                                      | 11.2%         | 6.9%  | 4.3% | 57.8%        |
| <b>Type 1 diabetes derivation set</b>                    |                                    |                                       |      |      |     |                                        |      |      |      |                                            |               |       |      |              |
| CNFL <sub>AUTO</sub>                                     | <12.5                              | <8.8                                  | 0.90 | 0.65 | 4.5 | <15.0                                  | 0.88 | 0.90 | 0.27 | 43.1%                                      | 10.8%         | 7.3%  | 3.5% | 46.2%        |
| CNFL <sub>MANUAL</sub>                                   | <16.4                              | <12.1                                 | 0.88 | 0.63 | 4.5 | <21.8                                  | 0.88 | 0.88 | 0.33 | 37.8%                                      | 11.5%         | 8.1%  | 3.5% | 50.8%        |
| <b>Type 2 diabetes derivation set</b>                    |                                    |                                       |      |      |     |                                        |      |      |      |                                            |               |       |      |              |
| CNFL <sub>AUTO</sub>                                     | <12.3                              | <8.7                                  | 0.90 | 0.74 | 2.9 | <15.0                                  | 0.88 | 0.75 | 0.31 | 33.1%                                      | 11.4%         | 5.1%  | 6.4% | 55.5%        |
| CNFL <sub>MANUAL</sub>                                   | <16.3                              | <12.1                                 | 0.83 | 0.67 | 2.0 | <21.3                                  | 0.90 | 0.79 | 0.27 | 35.6%                                      | 13.6%         | 8.1%  | 5.5% | 50.9%        |
| <b>Derived thresholds applied to the validation sets</b> |                                    |                                       |      |      |     |                                        |      |      |      |                                            |               |       |      |              |
| <i>Type 1 diabetes</i>                                   |                                    |                                       |      |      |     |                                        |      |      |      |                                            |               |       |      |              |
| CNFL <sub>AUTO</sub>                                     | <12.5                              | <8.8                                  | 0.87 | 0.56 | 2.7 | <15.0                                  | 0.88 | 0.88 | 0.29 | 40.2%                                      | 12.9%         | 9.0%  | 3.9% | 46.9%        |
| CNFL <sub>MANUAL</sub>                                   | <16.4                              | <12.1                                 | 0.85 | 0.55 | 2.6 | <21.8                                  | 0.90 | 0.85 | 0.36 | 30.9%                                      | 13.3%         | 10.2% | 3.1% | 55.9%        |
| <i>Type 2 diabetes</i>                                   |                                    |                                       |      |      |     |                                        |      |      |      |                                            |               |       |      |              |
| CNFL <sub>AUTO</sub>                                     | <12.3                              | <8.7                                  | 0.80 | 0.66 | 1.6 | <15.0                                  | 0.84 | 0.63 | 0.48 | 32.5%                                      | 17.8%         | 8.9%  | 8.9% | 49.6%        |
| CNFL <sub>MANUAL</sub>                                   | <16.3                              | <12.1                                 | 0.78 | 0.63 | 1.4 | <21.3                                  | 0.87 | 0.67 | 0.41 | 32.1%                                      | 17.5%         | 10.2% | 7.3% | 50.4%        |

Values are given in mm/mm<sup>2</sup>. DSP, diabetic sensorimotor polyneuropathy; Sn, sensitivity; Sp, specificity; PPV, positive predictive value; LR+, positive likelihood ratio; NPV, negative predictive value; LR-, negative likelihood ratio; FP, false positives; FN, false negatives.

\*Optimal single threshold from the primary analysis shown for comparison. This single threshold optimized sensitivity and specificity simultaneously. The pair of thresholds was used to determine an interval that optimized sensitivity and specificity individually. For example, for CNFL<sub>AUTO</sub> in the total study population, the interval values chosen were 8.6 and 15.3 mm/mm<sup>2</sup>. Values <8.3 mm/mm<sup>2</sup> rule in neuropathy, values ≥15.3 mm/mm<sup>2</sup> rule out neuropathy, and values within the interval 8.6-15.3 mm/mm<sup>2</sup> represent unclassified participants.

**ESM Table 5.** Details of Sensitivity Analysis #2 and Sensitivity Analysis #3 (undertaken to address use of a possible imperfect reference standard).

| Sensitivity Analysis Number | Alternate method to define cases | DM Type | IVCCM parameter        | Study Reference Standard |            |                   | Alternate definition |            |                   | <i>p</i> -value |
|-----------------------------|----------------------------------|---------|------------------------|--------------------------|------------|-------------------|----------------------|------------|-------------------|-----------------|
|                             |                                  |         |                        | N cases                  | N controls | AUC (95% CI)      | N cases              | N controls | AUC (95% CI)      |                 |
| 2                           | Composite reference standard     | T1DM    | CNFL <sub>AUTO</sub>   | 41                       | 43         | 0.73 (0.62, 0.84) | 41                   | 43         | 0.77 (0.67, 0.88) | 0.58            |
|                             |                                  | T1DM    | CNFL <sub>MANUAL</sub> | 41                       | 43         | 0.67 (0.55, 0.79) | 41                   | 43         | 0.70 (0.58, 0.82) | 0.75            |
|                             |                                  | T2DM    | CNFL <sub>AUTO</sub>   | 17                       | 33         | 0.67 (0.52, 0.83) | 27                   | 23         | 0.51 (0.35, 0.68) | 0.16            |
|                             |                                  | T2DM    | CNFL <sub>MANUAL</sub> | 17                       | 33         | 0.70 (0.55, 0.85) | 27                   | 23         | 0.50 (0.34, 0.67) | 0.08            |
| 3                           | Latent Class Analysis            | T1DM    | CNFL <sub>AUTO</sub>   | 151                      | 342        | 0.76 (0.71, 0.81) | 76                   | 417        | 0.80 (0.75, 0.85) | 0.28            |
|                             |                                  | T1DM    | CNFL <sub>MANUAL</sub> | 151                      | 342        | 0.72 (0.67, 0.77) | 76                   | 417        | 0.73 (0.66, 0.79) | 0.81            |
|                             |                                  | T2DM    | CNFL <sub>AUTO</sub>   | 214                      | 215        | 0.66 (0.60, 0.71) | 127                  | 302        | 0.68 (0.63, 0.73) | 0.52            |
|                             |                                  | T2DM    | CNFL <sub>MANUAL</sub> | 214                      | 215        | 0.67 (0.62, 0.72) | 127                  | 302        | 0.69 (0.64, 0.75) | 0.60            |

Due to differences in case-composition between definitions for DSP, comparisons of AUC were made using the method of Hanley and McNeil[19].

CNFL, corneal nerve fibre length; DM, diabetes mellitus; T1DM, type 1 diabetes mellitus; T2DM, type 2 diabetes mellitus.

### 3. ESM Figures

ESM Fig. 1. Flow of participants.

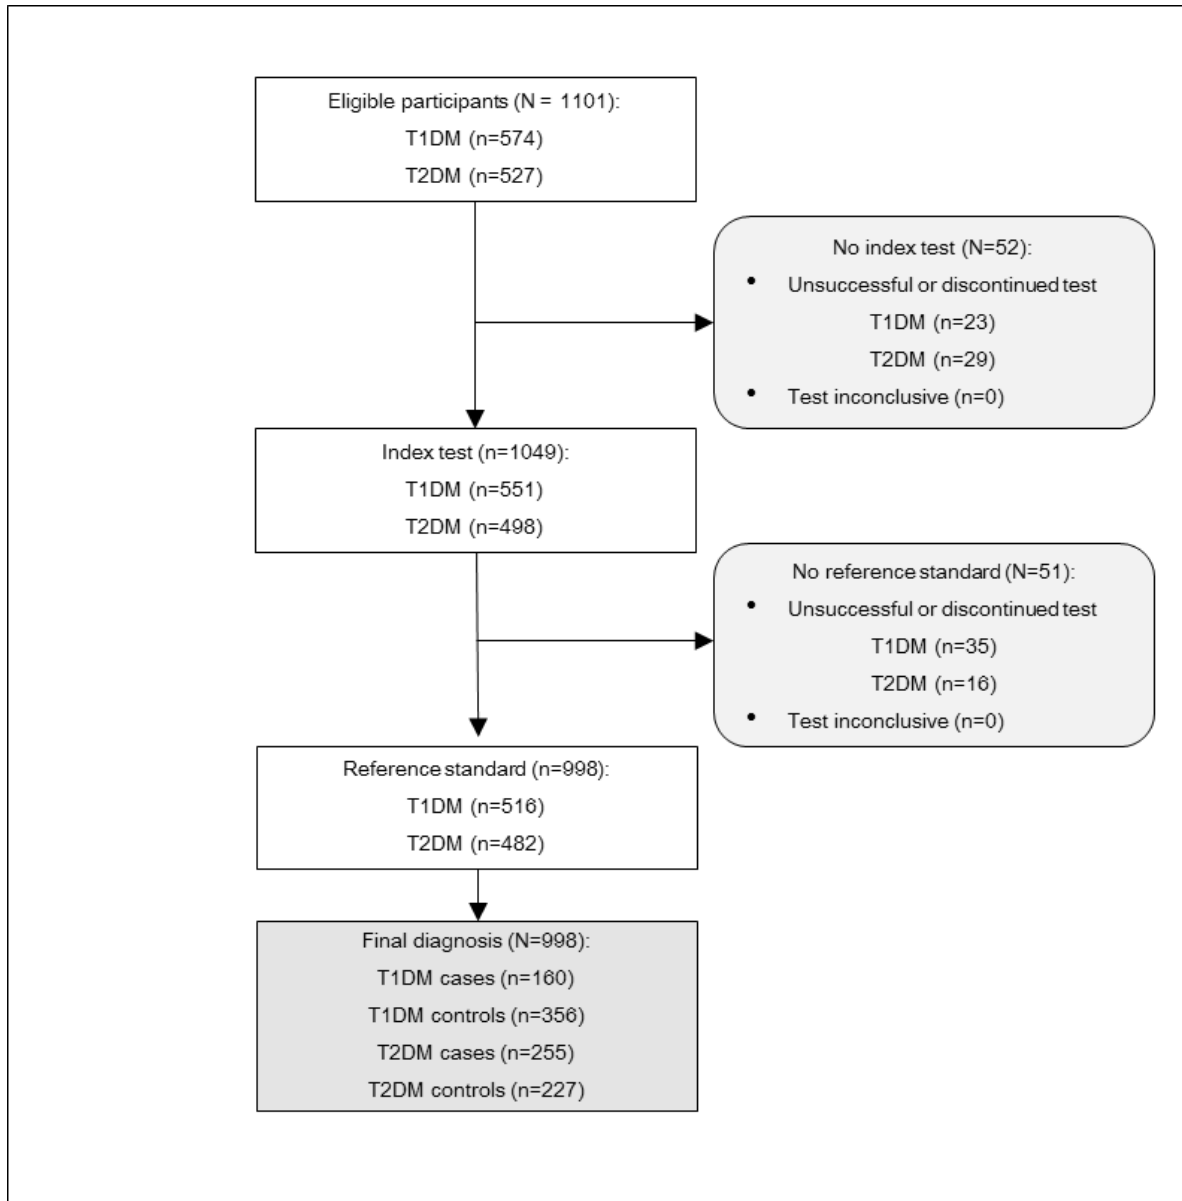

ESM Fig. 1 Legend: Index test was IVCCM and reference standard was clinical and electrophysiological assessment. T1DM, type 1 diabetes participants; T2DM, type 2 diabetes participants.

ESM Fig. 2. AUC for CNFL when altering the reference standard definitions for DSP.

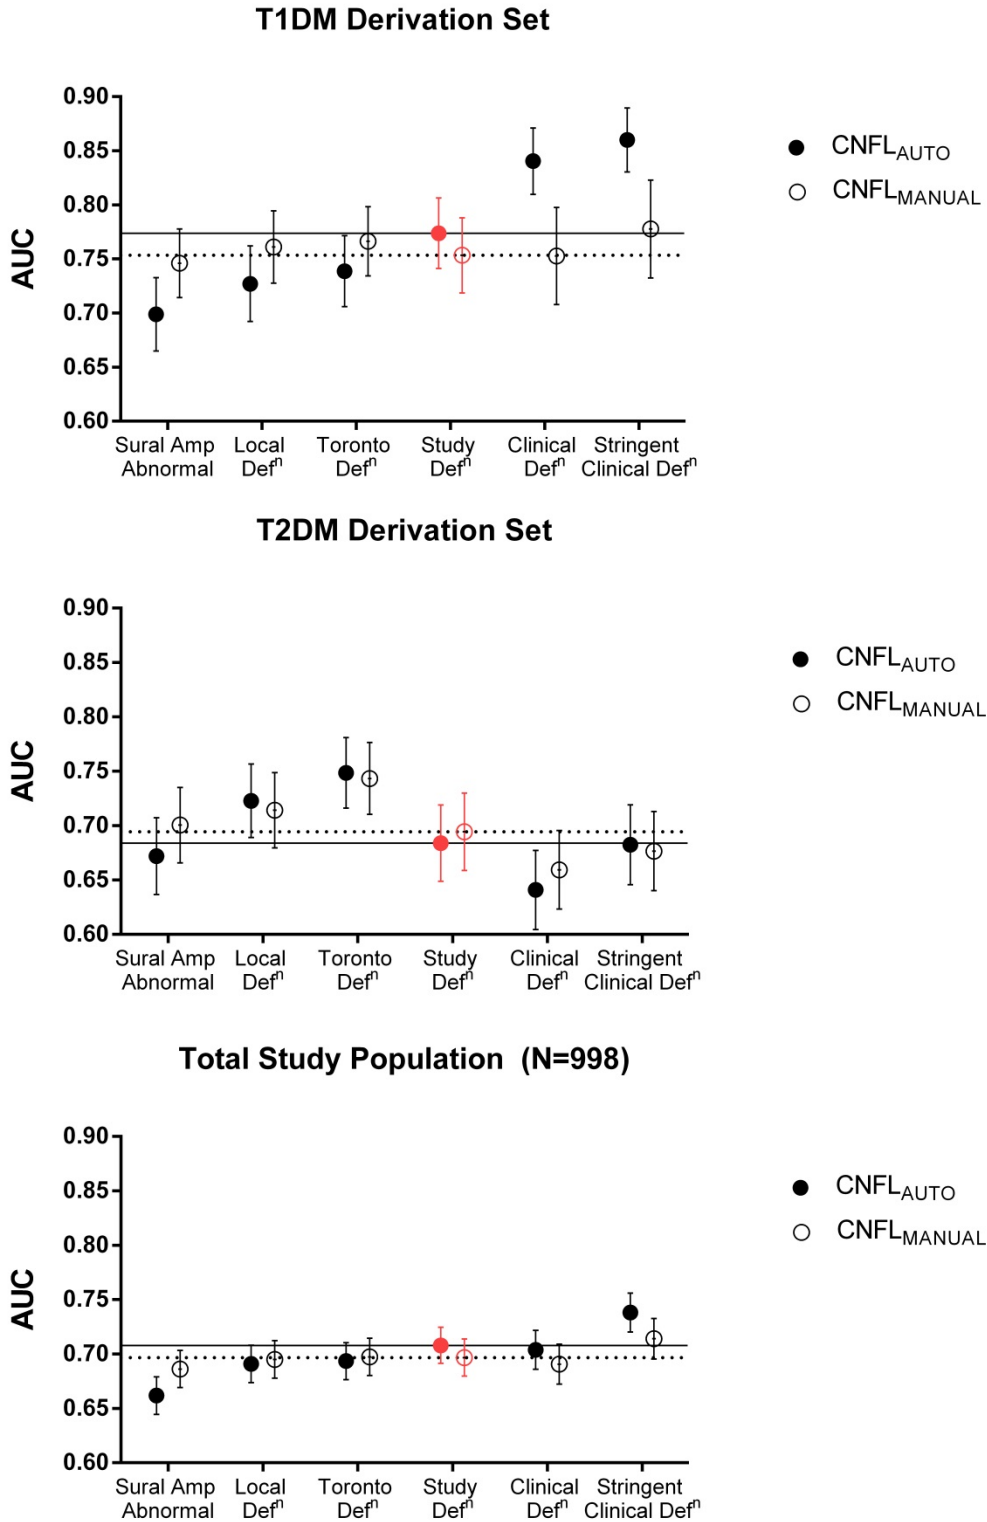

### Section 3. ESM Figures and Tables

ESM Fig. 2 Legend: Definitions to the left of the study definition represent less stringent definitions of neuropathy, while definitions to the right represent more stringent definitions. Red symbols indicate AUC for the study's reference standard definition. The solid horizontal lines represent the AUC for CNFL<sub>AUTO</sub> using the study definition as the reference standard. The dashed horizontal lines represent the AUC for CNFL<sub>MANUAL</sub> using the study definition as the reference standard. Error bars represent the standard error for AUC.

CNFL, corneal nerve fibre length; DSP, diabetic sensorimotor polyneuropathy; T1DM, type 1 diabetes mellitus; T2DM, type 2 diabetes mellitus; Def<sup>n</sup>, definition.

## ESM References

- [1] Pacaud D, Romanchuk KG, Tavakoli M, et al. (2015) The Reliability and Reproducibility of Corneal Confocal Microscopy in Children. *Invest Ophthalmol Vis Sci* 56: 5636-5640
- [2] Stem MS, Hussain M, Lentz SI, et al. (2014) Differential reduction in corneal nerve fiber length in patients with type 1 or type 2 diabetes mellitus. *J Diabetes Complications* 28: 658-661
- [3] Tavakoli M, Quattrini C, Abbott C, et al. (2010) Corneal confocal microscopy: a novel noninvasive test to diagnose and stratify the severity of human diabetic neuropathy. *Diabetes Care* 33: 1792-1797
- [4] Ahmed A, Bril V, Orszag A, et al. (2012) Detection of diabetic sensorimotor polyneuropathy by corneal confocal microscopy in type 1 diabetes: a concurrent validity study. *Diabetes Care* 35: 821-828
- [5] Edwards K, Pritchard N, Vagenas D, Russell A, Malik RA, Efron N (2012) Utility of corneal confocal microscopy for assessing mild diabetic neuropathy: baseline findings of the LANDMark study. *Clin Exp Optom* 95: 348-354
- [6] Tavakoli M, Malik RA (2011) Corneal confocal microscopy: a novel non-invasive technique to quantify small fibre pathology in peripheral neuropathies. *J Vis Exp* 47: 2194-3001
- [7] Hume DA, Lovblom LE, Ahmed A, et al. (2012) Higher magnification lenses versus conventional lenses for evaluation of diabetic neuropathy by corneal in vivo confocal microscopy. *Diabetes Res Clin Pract* 97: e37-40
- [8] Scarr D, Lovblom LE, Ostrovski I, et al. (2017) Agreement between automated and manual quantification of corneal nerve fiber length: Implications for diabetic neuropathy research. *J Diabetes Complications* 31: 1066-1073
- [9] Chen X, Graham J, Dabbah MA, Petropoulos IN, Tavakoli M, Malik RA (2017) An Automatic Tool for Quantification of Nerve Fibers in Corneal Confocal Microscopy Images. *IEEE Trans Biomed Eng* 64: 786-794
- [10] Halpern EM, Lovblom LE, Orlov S, Ahmed A, Bril V, Perkins BA (2013) The impact of common variation in the definition of diabetic sensorimotor polyneuropathy on the validity of corneal in vivo confocal microscopy in patients with type 1 diabetes: a brief report. *J Diabetes Complications* 27: 240-242
- [11] Ostrovski I, Lovblom LE, Farooqi MA, et al. (2015) Reproducibility of In Vivo Corneal Confocal Microscopy Using an Automated Analysis Program for Detection of Diabetic Sensorimotor Polyneuropathy. *PLoS One* 10: e0142309



#### Section 4. ESM References.

- [12] Chen X, Graham J, Dabbah MA, et al. (2015) Small nerve fiber quantification in the diagnosis of diabetic sensorimotor polyneuropathy: comparing corneal confocal microscopy with intraepidermal nerve fiber density. *Diabetes Care* 38: 1138-1144
- [13] England JD, Gronseth GS, Franklin G, et al. (2005) Distal symmetric polyneuropathy: a definition for clinical research: report of the American Academy of Neurology, the American Association of Electrodiagnostic Medicine, and the American Academy of Physical Medicine and Rehabilitation. *Neurology* 64: 199-207
- [14] Tesfaye S, Boulton AJ, Dyck PJ, et al. (2010) Diabetic neuropathies: update on definitions, diagnostic criteria, estimation of severity, and treatments. *Diabetes Care* 33: 2285-2293
- [15] Pop-Busui R, Boulton AJ, Feldman EL, et al. (2017) Diabetic Neuropathy: A Position Statement by the American Diabetes Association. *Diabetes Care* 40: 136-154
- [16] Brill V (1994) Role of electrophysiological studies in diabetic neuropathy. *Can J Neurol Sci* 21: S8-12
- [17] Quattrini C, Tavakoli M, Jeziorska M, et al. (2007) Surrogate markers of small fiber damage in human diabetic neuropathy. *Diabetes* 56: 2148-2154
- [18] Pencina MJ, D'Agostino RB, Sr., D'Agostino RB, Jr., Vasan RS (2008) Evaluating the added predictive ability of a new marker: from area under the ROC curve to reclassification and beyond. *Stat Med* 27: 157-172; discussion 207-112
- [19] Hanley JA, McNeil BJ (1983) A method of comparing the areas under receiver operating characteristic curves derived from the same cases. *Radiology* 148: 839-843
- [20] Levy D, Abraham R, Reid G (1989) A comparison of two methods for measuring thermal thresholds in diabetic neuropathy. *J Neurol Neurosurg Psychiatry* 52: 1072-1077
- [21] Rutjes AW, Reitsma JB, Coomarasamy A, Khan KS, Bossuyt PM (2007) Evaluation of diagnostic tests when there is no gold standard. A review of methods. *Health Technol Assess* 11: iii, ix-51
- [22] Janes H, Longton G, Pepe M (2009) Accommodating Covariates in ROC Analysis. *Stata J* 9: 17-39
